# Supplementary material for: Mapping forests in monsoon Asia with ALOS PALSAR 50-m mosaic images and MODIS imagery in 2010
Source: PubMed Central journal article supplement (PMC4750005; doi:10.1038/srep20880), 2016-02-11
Supplement: srep20880-s1.pdf [file srep20880-s1.pdf]

1 **Supplementary Information**

2 **Mapping forests in monsoon Asia with ALOS PALSAR 50-m mosaic images and MODIS**  
3 **imagery in 2010**

4

5 Yuanwei Qin, Xiangming Xiao, Jinwei Dong, Geli Zhang, Partha Sarathi Roy, Pawan Kumar Joshi, Hammad

6 Gilani, Manchiraju Sri Ramachandra Murthy, Cui Jin, Jie Wang, Yao Zhang, Bangqian Chen, Michael Angelo

7 Menarguez, Chandrashekhar M. Biradar, Rajen Bajgain, Xiangping Li, Shengqi Dai, Ying Hou, Fengfei Xin,

8 Berrien Moore III

9

10 A. Supplementary Figure Legends and Figures

11 B. Supplementary Tables

12 A. Supplementary Figure Legends and Figures

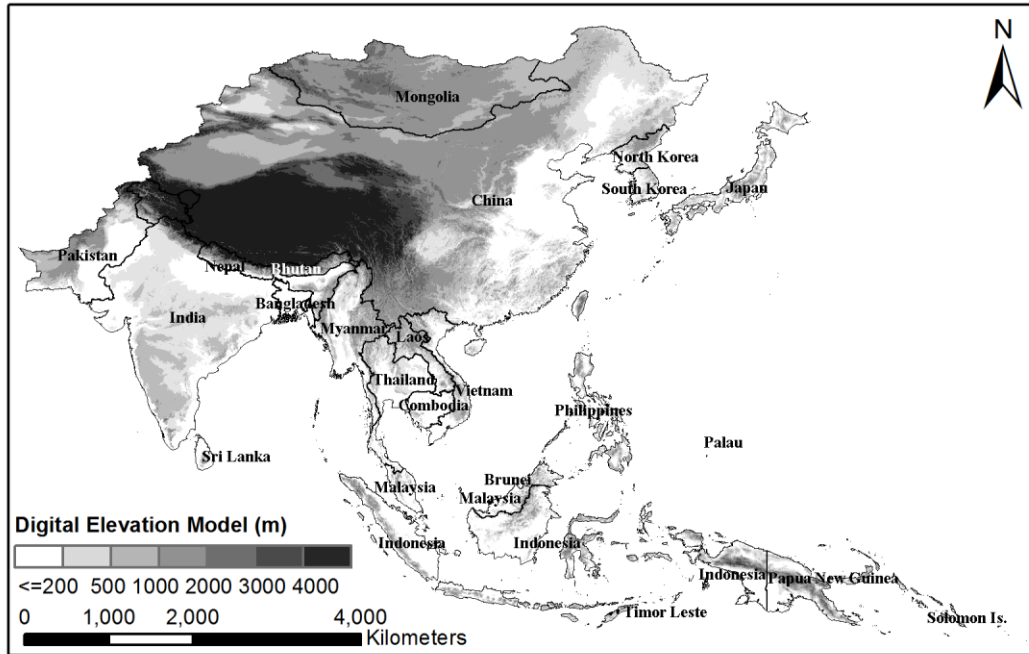

13

14 Figure S1. The study area of monsoon Asia. The background is the 1-km Digital Elevation Model  
15 (DEM) from Global 30 Arc-Second Elevation (GTOPO30) (<https://lta.cr.usgs.gov/GTOPO30>). The  
16 country boundaries come from the Food and Agriculture Organization of the United Nations  
17 (<http://data.fao.org/map?entryId=025a52fb-639d-4547-a9aa-7d2a6de5aae0&tab=metadata>).  
18 This figure was produced using ArcGIS 10.1.

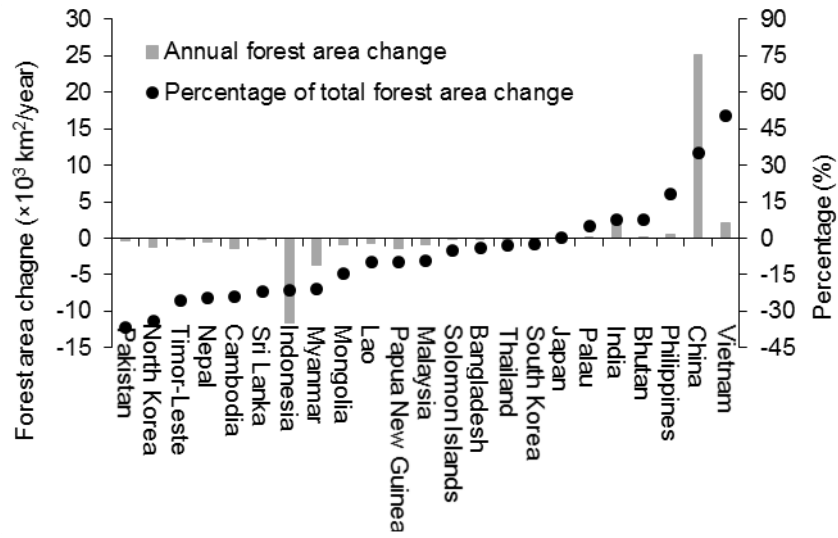

19

20 Figure S2. Forest area changes in Monsoon Asia from 1990 to 2012 and the data provided by  
 21 FAOSTAT<sup>1</sup>. This figure was produced using Microsoft Excel 2013.

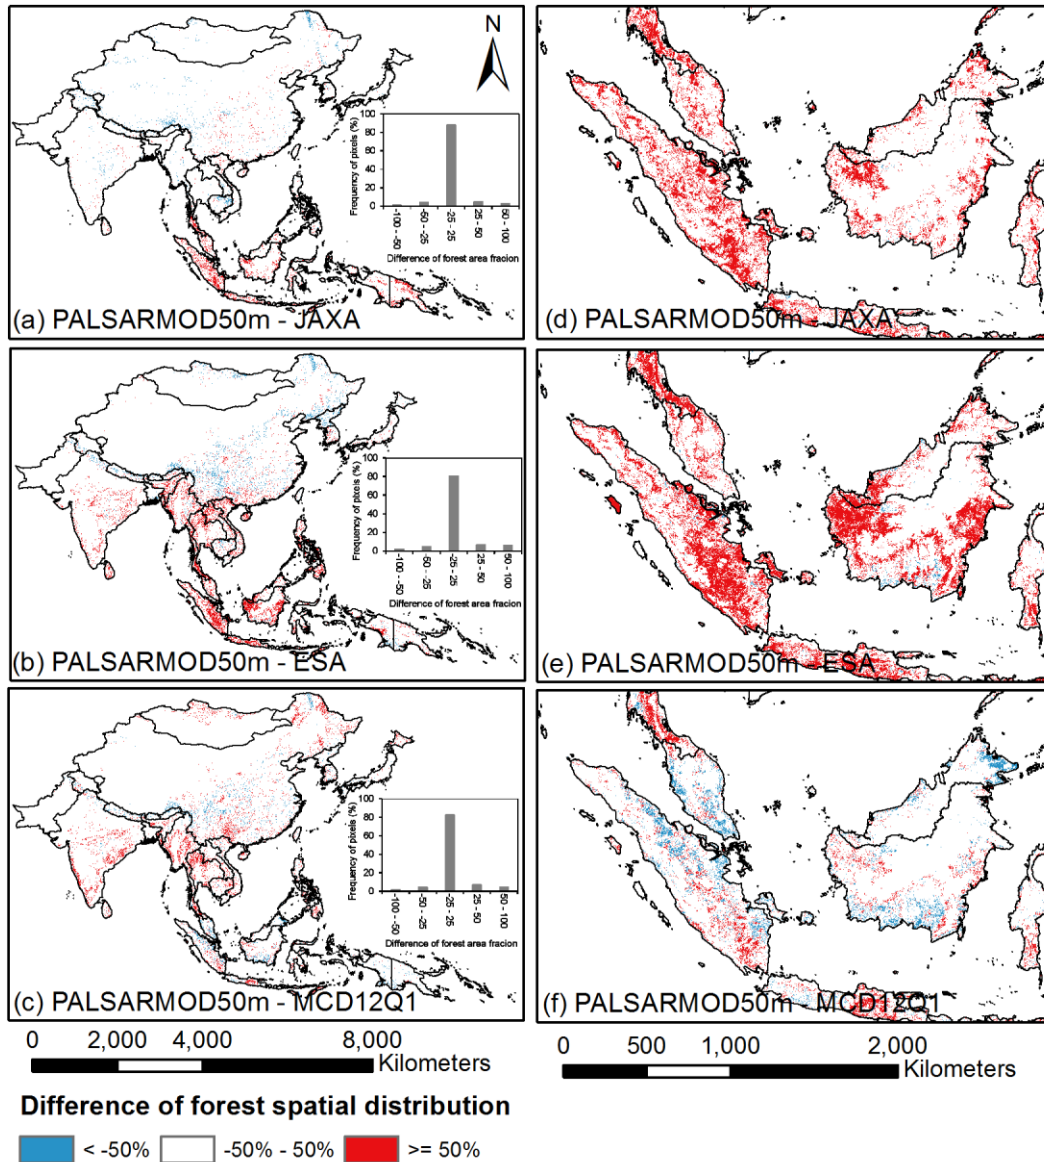

22

23 Figure S3. Spatial differences among multiple forest maps at the spatial resolution of 1,500 m in  
 24 monsoon Asia in 2010. (a) Spatial difference between PALSARMOD50m forest/non-forest map  
 25 and JAXA forest/non-forest map. (b) Spatial difference between PALSARMOD50m forest/non-  
 26 forest map and ESA forest/non-forest map. (c) Spatial difference between PALSARMOD50m  
 27 forest/non-forest map and MCD12Q1 forest/non-forest map. (d, e, f) Zoomed-in maps in  
 28 Southeast Asia from (a, b, c), respectively. This figure was produced using ArcGIS 10.1.

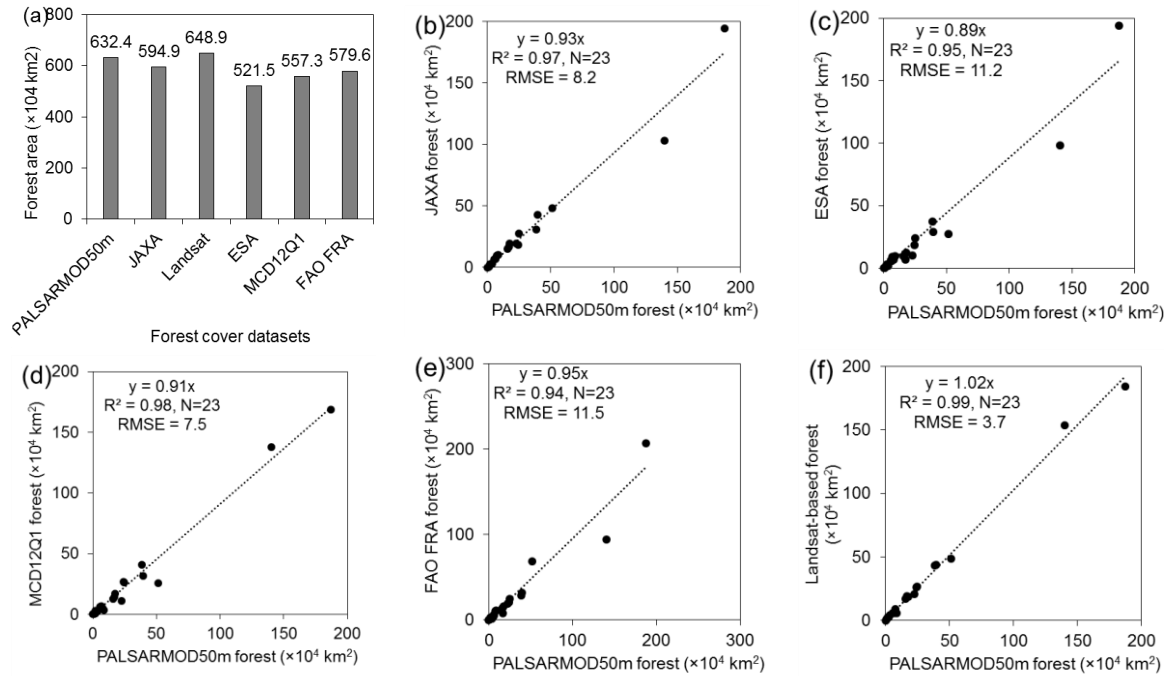

29 Figure S4. Forest area comparisons at the country scale from multiple forest datasets in  
 30 monsoon Asia in 2010. (a) Forest areas from multiple forest datasets in monsoon Asia. (b, c, d,  
 31 e, f) The linear relationships between PALSARMOD50m forest area and the forest areas from  
 32 JAXA, ESA, MCD12Q1, FAO FRA, and Landsat-based forest datasets. This figure was produced  
 33 using Microsoft Excel 2013.

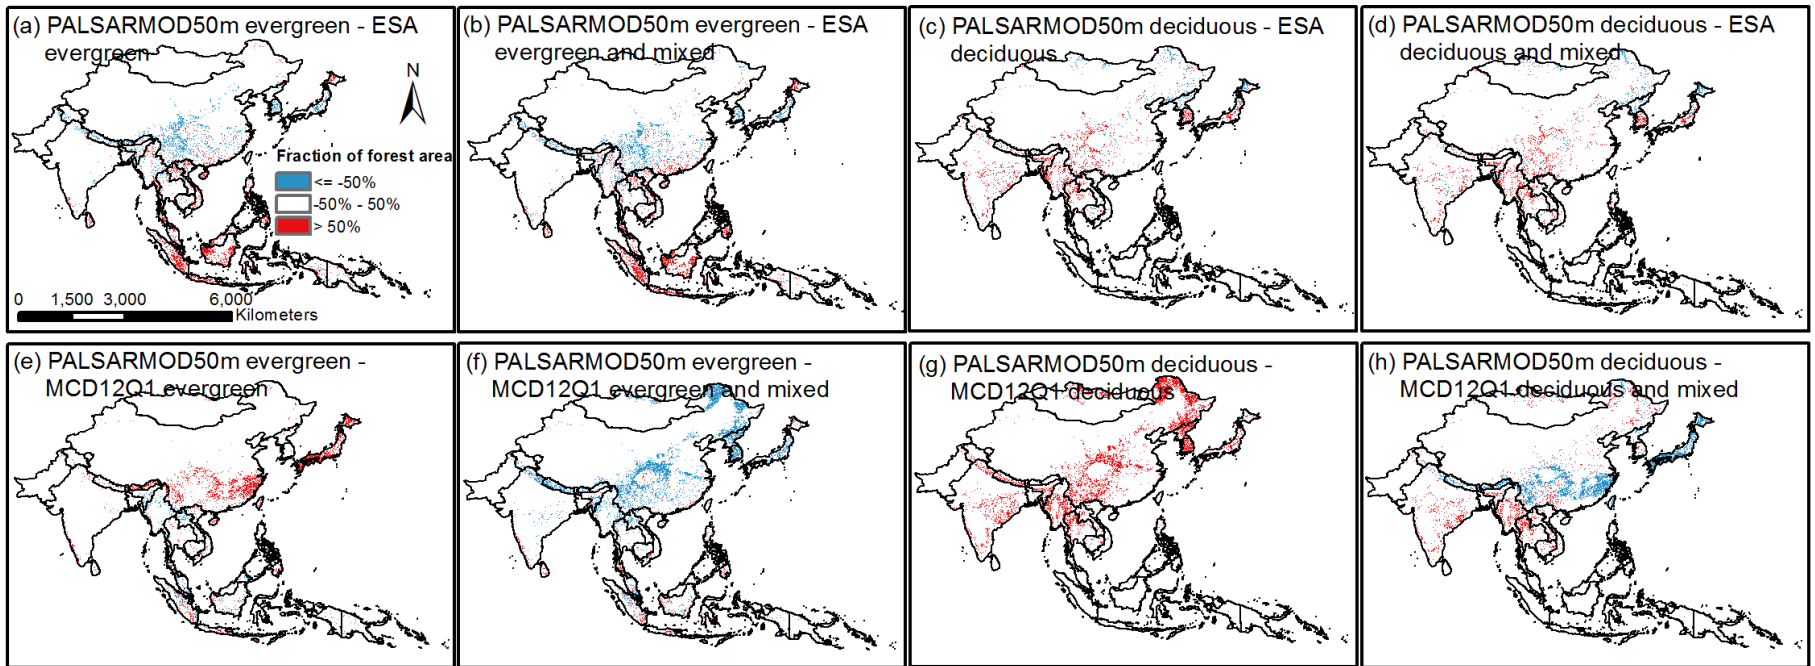

34

35 Figure S5. Spatial differences of evergreen and deciduous forests between PALSARMOD50m forest/non-forest and ESA, MCD12Q1 forest/non-  
 36 forest maps at the spatial resolution of 1,500 in monsoon Asia. **(a, b)** Spatial differences between PALSARMOD50m evergreen forests and  
 37 ESA evergreen forests, and evergreen and mixed forests, respectively. **(c, d)** Spatial differences between PALSARMOD50m deciduous forests  
 38 and ESA deciduous forests, and deciduous and mixed forests, respectively. **(e, f)** Spatial differences between PALSARMOD50m evergreen  
 39 forests and MCD12Q1 evergreen forests, and evergreen and mixed forests, respectively. **(g, h)** Spatial differences between PALSARMOD50m  
 40 deciduous forests and MCD12Q1 deciduous forests, and deciduous and mixed forests, respectively. This figure was produced using ArcGIS  
 41 10.1.

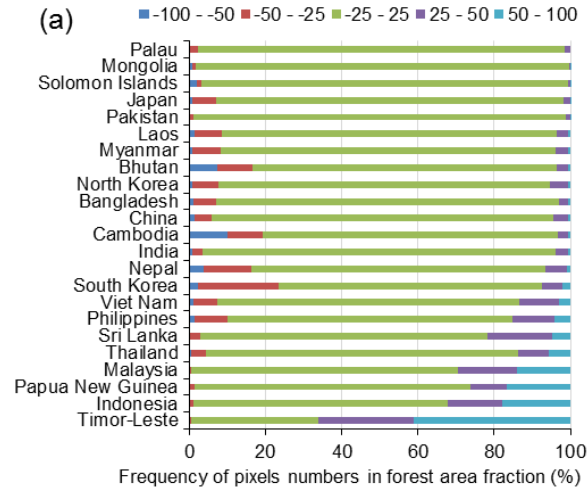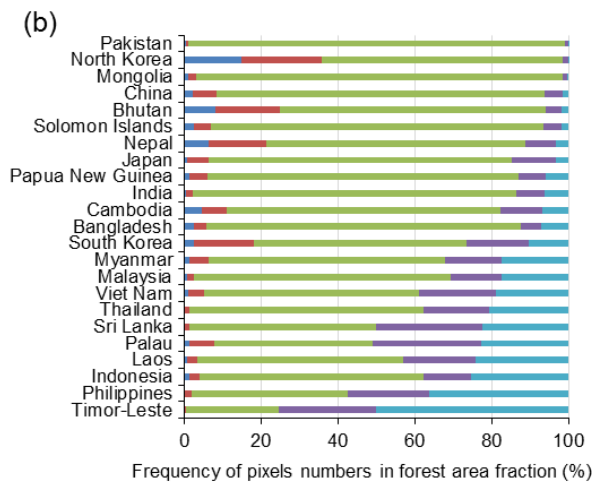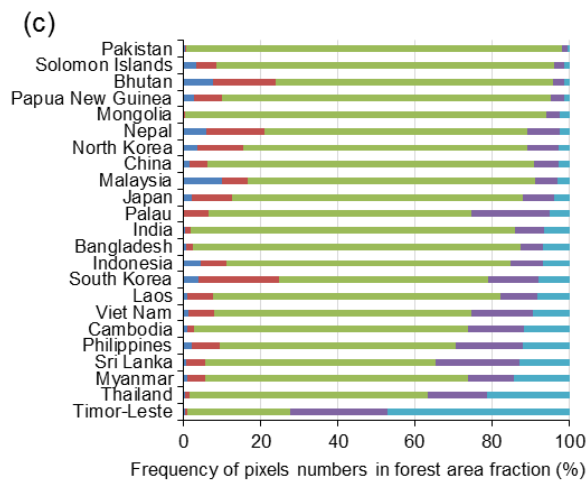

42 Figure S6. Comparison of the fraction of forest area at the spatial resolution of 1,500 m. (a)  
 43 Comparison between PALSARMOD50m forest/non-forests map and JAXA forest/non-forest map,  
 44 i.e., PALSARMOD50m - JAXA. (b) Comparison between PALSARMOD50m forest/non-forests map  
 45 and ESA forest/non-forest map, i.e., PALSARMOD50m - ESA. (c) Comparison between  
 46 PALSARMOD50m forest/non-forests map and MCD12Q1 forest/non-forest map, i.e.,  
 47 PALSARMOD50m - MCD12Q1. This figure was produced using Microsoft Excel 2013.

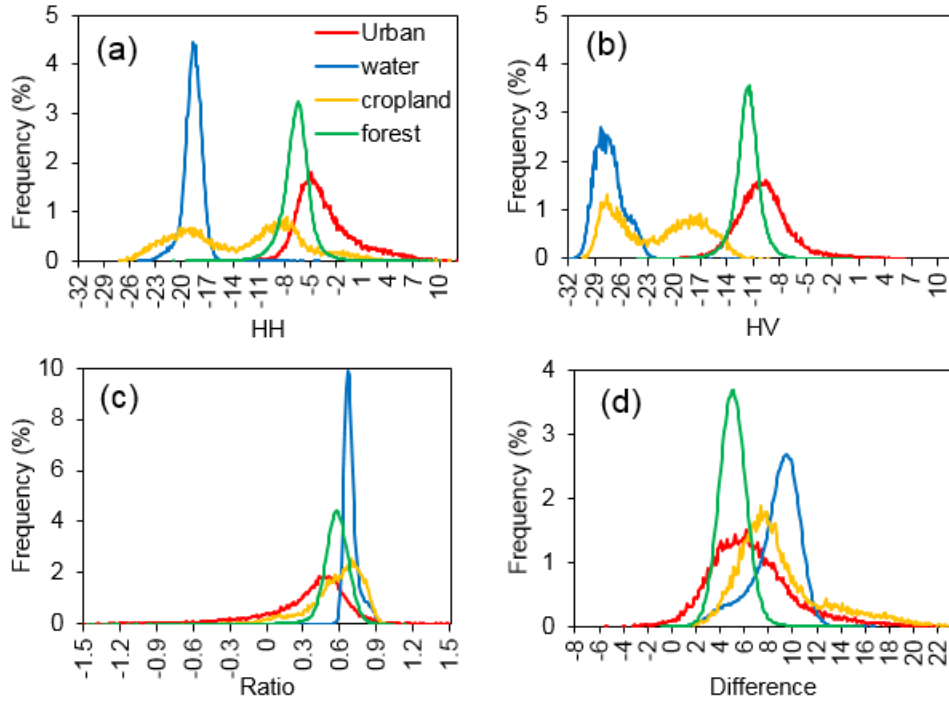

48

49 Figure S7. The backscatter signatures of different land cover types based on the ALOS PALSAR  
 50 gamma naught. **(a, b, c, d)** are the HH, HV, Ratio (HH/HV), and Difference (HH-HV),  
 51 respectively. This figure was produced using Microsoft Excel 2013.



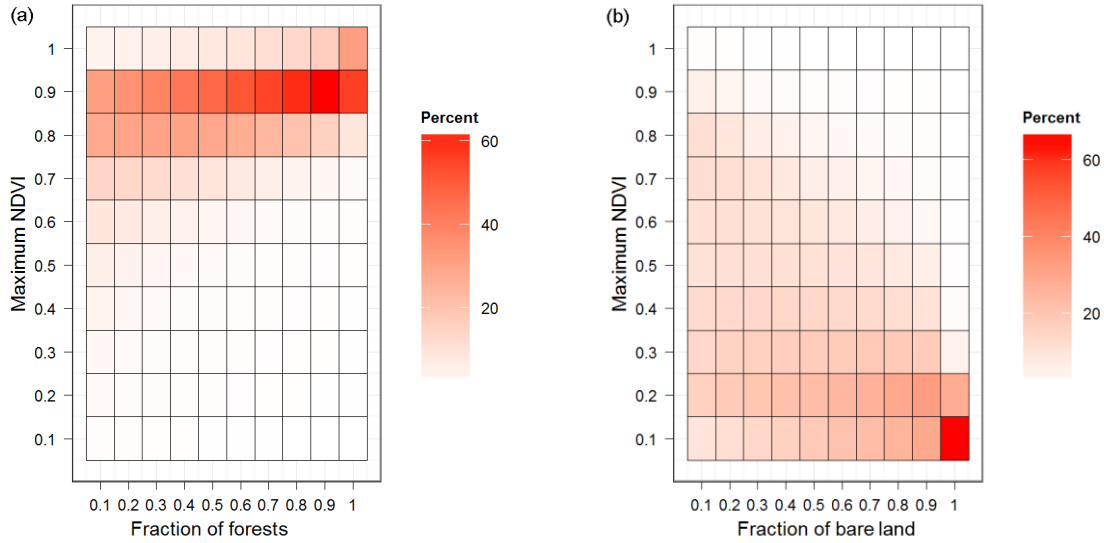

52 Figure S8. The frequency of the annual maximum NDVI of forest and bare land in different  
 53 fractions. **(a)** Forest. **(b)** Bare land. NDVI data was from the 16-day MOD13Q1 NDVI product  
 54 (250-m spatial resolution) for 2010. The 1-km forest and bare land layers were from the 2010  
 55 land use/cover map generated by the Chinese Academy of Sciences through the visual  
 56 interpretation of Landsat TM/ETM+ images<sup>2,3</sup> (<http://www.resdc.cn/data.aspx?DATAID=99>). This  
 57 figure was produced using R 3.2.0.

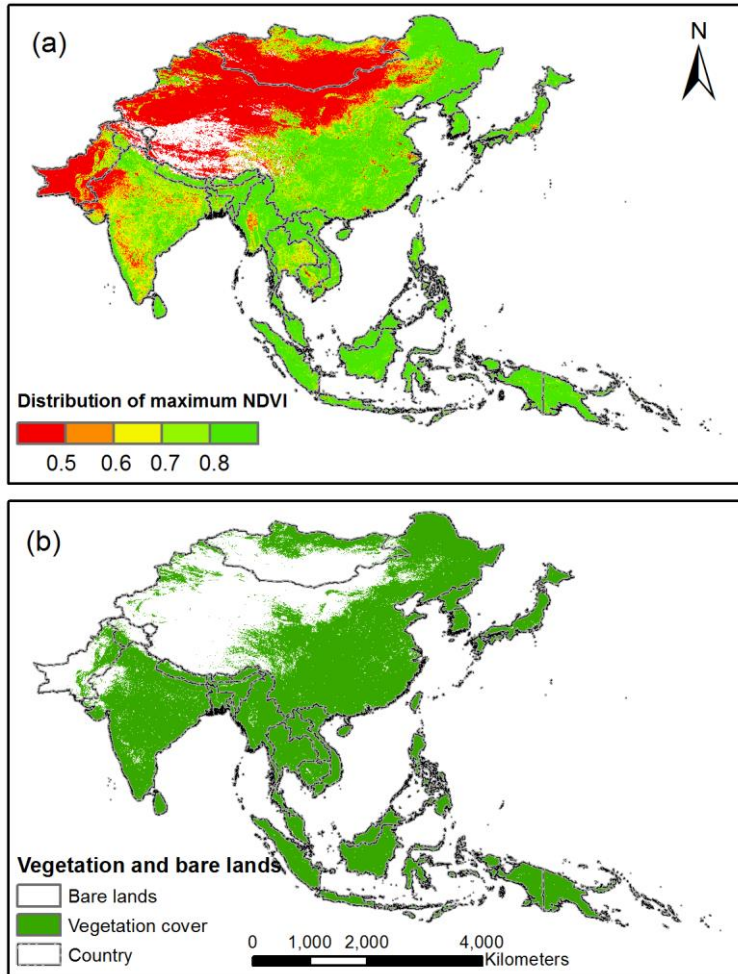

58

59 Figure S9. Spatial distribution of maximum NDVI and vegetation lands in monsoon Asia. (a)  
 60 Maximum NDVI from 16-day MOD13Q1 NDVI product at the spatial resolution of 250 m in 2010.  
 61 (b) Vegetation and bare lands maps generated from (a), based on the threshold value of  
 62 maximum NDVI (0.5). This figure was produced using ArcGIS 10.1.

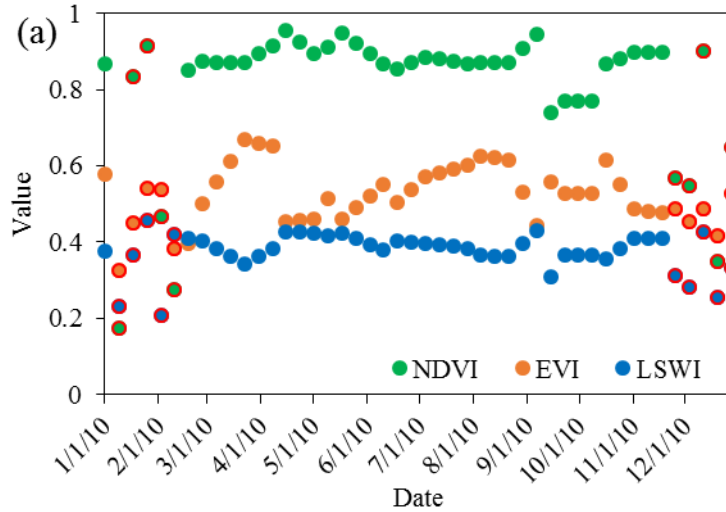

63

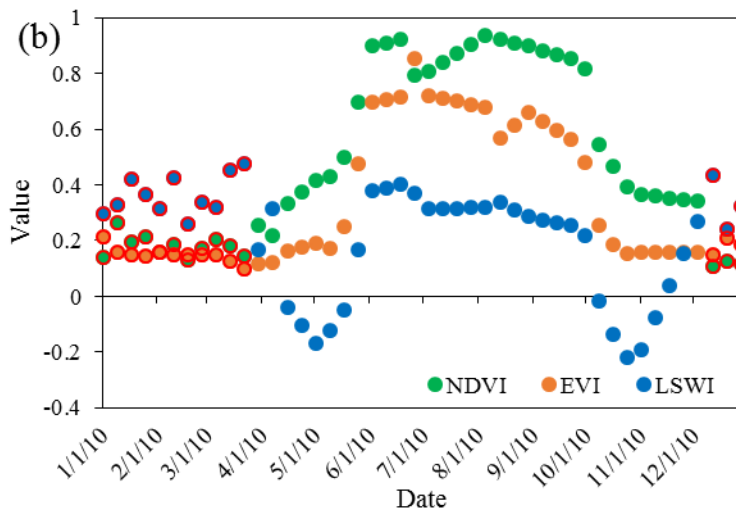

64

65 Figure S10. Temporal profiles of NDVI, EVI, and LSWI for evergreen and deciduous forests in  
 66 monsoon Asia in 2010, derived from 8-day MOD09A1 products at the spatial resolution of 500 m.  
 67 The time series of MOD09A1 products are available from the Earth Observation and Modeling  
 68 Facility in the University of Oklahoma (<http://www.eomf.ou.edu/>). (a) NDVI, EVI, and LSWI for  
 69 evergreen forest (0.8133°N, 109.6975°E); (b) NDVI, EVI, and LSWI of deciduous forest  
 70 (41.2862°N, 124.7911°E). The gaps caused by three or less continuous bad observations (cloud,  
 71 cloud shadows, snow/ice, et al.) were filled through linear interpolation. Those gaps caused by  
 72 four or more continuous bad observations were not processed and were labeled with red circles.  
 73 This figure was produced using Microsoft Excel 2013.

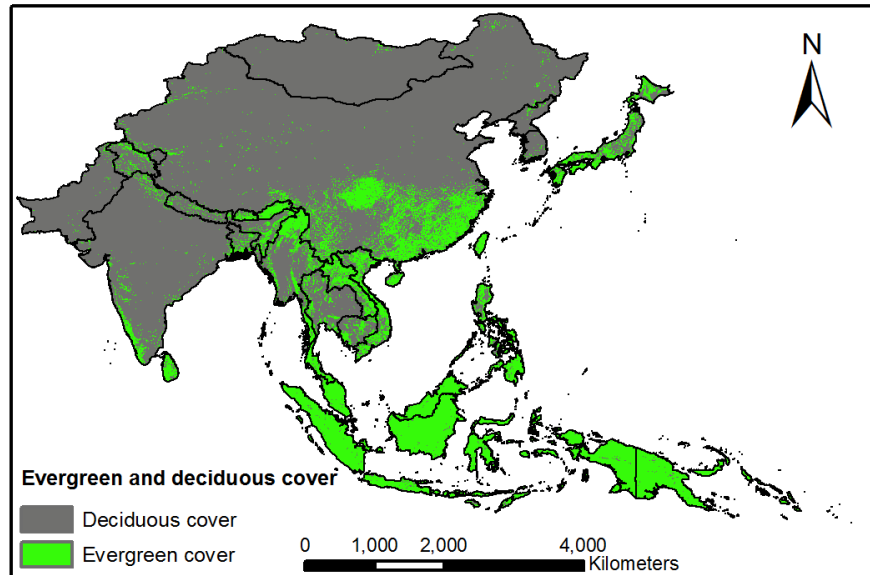

74

75 Figure S11. Spatial distribution map of evergreen and deciduous vegetation in monsoon Asia in  
 76 2010 based on the 8-day Land Surface Water Index (LSWI) at a spatial resolution of 500 m  
 77 derived from MOD09A1 land surface reflectance products. This figure was produced using ArcGIS  
 78 10.1.

## 79 B. Supplementary Tables

80 Table S1. Brief description of the multiple forest datasets in 2010 used in this study.

| Forest cover datasets | Forest land cover types                                                                                                                     | Spatial resolution | Algorithms                  | Data source                                                                                                                                                                                                                 | References     |
|-----------------------|---------------------------------------------------------------------------------------------------------------------------------------------|--------------------|-----------------------------|-----------------------------------------------------------------------------------------------------------------------------------------------------------------------------------------------------------------------------|----------------|
| MCD12Q1 (IGBP)        | Woody vegetation with a percent coverage over 60% and tree height exceeding 2-m.                                                            | 500-m              | Supervised classification   | 500-m aggregated 32-day average nadir BRDF-adjusted reflectance (NBAR), enhanced vegetation index (EVI), Land Surface Temperature (LST), and annual metrics (min, max, and mean values) for EVI, LST and NBAR bands in 2010 | <sup>4,5</sup> |
| ESA CCI-LC            | Woody vegetation with a percent coverage over 15%.                                                                                          | 300-m              | Unsupervised classification | 300-m land cover map produced by 7-day time series MERIS imagery during 2003-2012 as baseline, 1-km SPOT-VEGETATION (2008-2012) time series for updating                                                                    | <sup>6</sup>   |
| JAXA F/NF             | Woody vegetation coverage over 10%, determined by high spatial resolution images in Google Earth.                                           | 50-m               | Supervised classification   | 25-m PALSAR Fine Beam Double Polarization mode data from June to September in 2010                                                                                                                                          | <sup>7</sup>   |
| PALSARMOD50m F/NF     | Woody vegetation coverage over 10% determined by high spatial resolution images in Google Earth.                                            | 50-m               | Supervised classification   | 50-m PALSAR Fine Beam Double Polarization mode data from June to September in 2010                                                                                                                                          | This study     |
| FAO FRA               | Land spanning over 0.5 ha with tree height exceeding 5-m and a canopy cover more than 10%, or trees able to reach these thresholds in situ. | Country            | Statistical datasets        | Country statistics in 2010                                                                                                                                                                                                  | <sup>8</sup>   |
| Landsat forest        | Canopy closure with a percent coverage over 10% and all vegetation taller than 5-m in height.                                               | Country            | Supervised classification   | 30-m Landsat ETM+ images in growing season in circa 2010                                                                                                                                                                    | <sup>9</sup>   |

81

82 Table S2. The confusion matrix between the PALSAR/MODIS-based forest map and validation  
 83 samples in the Areas of Interest (AOIs) collected through high resolution images in Google Earth  
 84 and geo-referenced photos from the fields.

| Class                     | Ground truth samples (pixels) |            | Total classified pixels | User accuracy (%) | Commission error (%)     |      |
|---------------------------|-------------------------------|------------|-------------------------|-------------------|--------------------------|------|
|                           | Forest                        | Non-forest |                         |                   |                          |      |
| Classification            | <b>Forest</b>                 | 211729     | 2396                    | 214125            | 98.88                    | 1.12 |
|                           | Non-forest                    | 27898      | 492485                  | 520383            | 94.64                    | 5.36 |
| Total ground truth pixels |                               | 239627     | 494881                  | 734508            |                          |      |
| Producer accuracy (%)     |                               | 88.36      | 99.52                   |                   |                          |      |
| Omission error (%)        |                               | 11.64      | 0.48                    |                   |                          |      |
| Overall accuracy (%)      |                               | 95.88      |                         |                   | Kappa coefficient = 0.90 |      |

85 Table S3. Forest areas from PALSARMOD50m, JAXA, Landsat (the University of Maryland), MCD12Q1, ESA, and FAO FRA forest datasets at  
86 country scale in monsoon Asia in 2010.

| Country          | PALSARMOD50m F/NF |           |           | JAXA   | Landsat | MCD12Q1 F/NF |           |           |        | ESA F/NF |           |           |       | FAO FRA |
|------------------|-------------------|-----------|-----------|--------|---------|--------------|-----------|-----------|--------|----------|-----------|-----------|-------|---------|
|                  | Total             | Evergreen | Deciduous |        |         | Total        | Evergreen | Deciduous | Mixed  | Total    | Evergreen | Deciduous | Mixed |         |
| Bangladesh       | 1.97              | 0.84      | 1.12      | 2.07   | 2.60    | 0.77         | 0.40      | 0.01      | 0.37   | 1.06     | 0.27      | 0.80      | 0.00  | 1.44    |
| Bhutan           | 2.27              | 1.75      | 0.53      | 2.71   | 2.67    | 2.82         | 0.96      | 0.01      | 1.85   | 2.78     | 2.65      | 0.13      | 0.00  | 3.25    |
| Cambodia         | 7.67              | 4.97      | 2.68      | 9.34   | 9.29    | 5.04         | 4.75      | 0.07      | 0.24   | 6.80     | 4.54      | 2.27      | 0.00  | 10.09   |
| China            | 187.33            | 67.86     | 119.46    | 194.50 | 184.11  | 168.60       | 21.17     | 9.49      | 137.89 | 194.01   | 100.17    | 92.42     | 1.42  | 206.86  |
| North Korea      | 6.48              | 0.45      | 6.02      | 6.78   | 5.74    | 6.93         | 0.04      | 1.28      | 5.60   | 9.03     | 0.44      | 8.53      | 0.05  | 5.67    |
| India            | 51.47             | 14.04     | 37.45     | 48.43  | 48.39   | 25.82        | 11.14     | 2.94      | 11.74  | 27.15    | 14.81     | 12.38     | 0.00  | 68.43   |
| Indonesia        | 140.12            | 138.68    | 1.29      | 103.27 | 153.33  | 137.73       | 136.89    | 0.11      | 0.56   | 98.13    | 97.86     | 0.00      | 0.27  | 94.43   |
| Japan            | 24.89             | 17.60     | 7.25      | 27.31  | 26.93   | 26.25        | 0.76      | 2.09      | 23.26  | 24.11    | 17.22     | 6.48      | 0.41  | 24.98   |
| Laos             | 17.65             | 13.74     | 3.88      | 19.14  | 18.81   | 16.87        | 16.73     | 0.05      | 0.15   | 12.21    | 11.17     | 1.06      | 0.00  | 15.75   |
| Malaysia         | 24.26             | 24.09     | 0.17      | 18.36  | 26.04   | 26.83        | 26.76     | 0.01      | 0.02   | 18.71    | 18.69     | 0.00      | 0.02  | 20.46   |
| Mongolia         | 8.72              | 0.53      | 8.13      | 10.01  | 5.77    | 3.65         | 0.19      | 0.14      | 3.34   | 9.77     | 0.52      | 9.20      | 0.04  | 10.90   |
| Myanmar          | 39.55             | 22.54     | 16.97     | 42.88  | 43.89   | 31.70        | 24.73     | 0.67      | 6.35   | 28.90    | 22.05     | 6.86      | 0.00  | 31.77   |
| Nepal            | 5.52              | 1.38      | 4.15      | 6.41   | 5.57    | 6.32         | 0.08      | 0.01      | 6.24   | 6.30     | 4.11      | 2.20      | 0.00  | 3.64    |
| Pakistan         | 1.49              | 0.25      | 1.24      | 1.18   | 1.62    | 0.67         | 0.42      | 0.00      | 0.24   | 1.26     | 0.89      | 0.36      | 0.00  | 1.69    |
| Palau            | 0.03              | 0.03      | 0.00      | 0.03   | 0.04    | 0.03         | 0.02      | 0.00      | 0.00   | 0.02     | 0.02      | 0.00      | 0.00  | 0.04    |
| Papua New Guinea | 38.72             | 38.56     | 0.14      | 31.00  | 43.20   | 40.90        | 40.62     | 0.01      | 0.24   | 37.47    | 37.39     | 0.00      | 0.07  | 28.73   |
| Philippines      | 16.98             | 15.36     | 1.63      | 16.43  | 19.27   | 14.16        | 13.79     | 0.16      | 0.12   | 6.81     | 6.76      | 0.00      | 0.05  | 7.67    |
| South Korea      | 6.04              | 0.38      | 5.64      | 7.04   | 5.67    | 6.26         | 0.07      | 0.92      | 5.24   | 5.64     | 3.01      | 2.61      | 0.02  | 6.22    |
| Solomon Islands  | 2.30              | 2.29      | 0.00      | 2.44   | 2.70    | 2.45         | 2.41      | 0.00      | 0.01   | 2.40     | 2.36      | 0.00      | 0.05  | 2.21    |
| Sri Lanka        | 3.53              | 3.21      | 0.32      | 2.83   | 4.17    | 2.48         | 2.42      | 0.02      | 0.04   | 1.67     | 1.64      | 0.03      | 0.00  | 1.86    |
| Thailand         | 22.62             | 12.00     | 10.61     | 19.30  | 21.01   | 10.79        | 9.84      | 0.12      | 0.80   | 10.30    | 7.77      | 2.55      | 0.00  | 18.97   |
| Timor-Leste      | 0.90              | 0.76      | 0.14      | 0.30   | 0.83    | 0.25         | 0.22      | 0.01      | 0.02   | 0.20     | 0.20      | 0.00      | 0.00  | 0.74    |
| Vietnam          | 15.82             | 12.67     | 3.17      | 14.89  | 17.26   | 12.84        | 11.99     | 0.10      | 0.61   | 9.36     | 8.53      | 0.80      | 0.04  | 13.80   |
| Total            | 632.44            | 398.36    | 233.76    | 594.78 | 648.91  | 557.34       | 329.40    | 18.23     | 209.10 | 521.51   | 369.79    | 149.35    | 2.47  | 579.59  |

87

- 88 1 FAO. *FAOSTAT. Emissions - Land Use*, <[http://faostat3.fao.org/download/G2/\\*/E](http://faostat3.fao.org/download/G2/*/E)>  
89 (2013).
- 90 2 Liu, J. Y. *et al.* Spatiotemporal characteristics, patterns, and causes of land-use changes  
91 in China since the late 1980s. *J Geogr Sci* **24**, 195-210, doi:10.1007/s11442-014-1082-6  
92 (2014).
- 93 3 Zhang, Z. X. *et al.* A 2010 update of National Land Use/Cover Database of China at  
94 1:100000 scale using medium spatial resolution satellite images. *Remote Sens Environ*  
95 **149**, 142-154, doi:DOI 10.1016/j.rse.2014.04.004 (2014).
- 96 4 Friedl, M. A. *et al.* MODIS Collection 5 global land cover: Algorithm refinements and  
97 characterization of new datasets. *Remote Sens Environ* **114**, 168-182, doi:DOI  
98 10.1016/j.rse.2009.08.016 (2010).
- 99 5 Friedl, M. A. *et al.* Global land cover mapping from MODIS: algorithms and early results.  
100 *Remote Sens Environ* **83**, 287-302, doi:Doi 10.1016/S0034-4257(02)00078-0 (2002).
- 101 6 European Space Agency. Land Cover CCI PRODUCT USER GUIDE (Version 2 ). (2014).
- 102 7 Shimada, M. *et al.* New global forest/non-forest maps from ALOS PALSAR data (2007–  
103 2010). *Remote Sens Environ* **155**, 13-31, doi:10.1016/j.rse.2014.04.014 (2014).
- 104 8 Nations, F. a. A. O. o. t. U. Global Forest Resource Assessment (FRA) 2010. (Rome, 2012).
- 105 9 Hansen, M. C. *et al.* High-Resolution Global Maps of 21st-Century Forest Cover Change.  
106 *Science* **342**, 850-853, doi:DOI 10.1126/science.1244693 (2013).
